# Supplementary material for: Safety and preliminary efficacy of orally administered lyophilized fecal microbiota product compared with frozen product given by enema for recurrent Clostridium difficile infection: A randomized clinical trial
Source: PubMed Central journal article supplement (PMC6214502; doi:10.1371/journal.pone.0205064), 2018-11-02
Supplement: pone.0205064.s002.pdf [file pone.0205064.s002.pdf]

**ClinicalTrials.gov PRS**  
 Protocol Registration and Results System

[Contact ClinicalTrials.gov PRS](#)

Org: UTexas\_Houston User: zjiang [Logout](#)

[Home](#) > Record Summary

ID: HSC-SPH-14-0020 Fecal Microbiota Transplantation to Treat Recurrent C. Difficile Associated Diarrhea Via Retention Enema or Oral Route NCT02449174

**Record Summary**

[Home](#) [Help](#)

**Record Status**

In Progress → Entry Completed → **Approved** → Released → PRS Review → Public

[Reset to In-Progress...](#)

**Next Step: Correct Error(s)**

Record Owner: zjiang

Access List: [Edit](#)

Last Update: 06/20/2018 12:46  
by zjiang

Upload: Allowed [Edit](#)

**Initial Release: 12/17/2014**

PRS Review: [Review History](#)

Last Release: 11/16/2016  
[Receipt](#) (PDF)

Public Site: Last Public Release: 11/16/2016  
[View on ClinicalTrials.gov](#)

Results Expected: No later than May 2019

FDAAA: Probable ACT

All Results Expected: No later than December 2018

[Spelling](#) [Preview](#) [Draft Receipt \(PDF RTF\)](#) [Download XML](#)

**Open Protocol Section**

Identifiers: NCT02449174 Unique Protocol ID: HSC-SPH-14-0020

Brief Title: Fecal Microbiota Transplantation to Treat Recurrent C. Difficile Associated Diarrhea Via Retention Enema or Oral Route

- Module Status:
- Study Identification: ✓
  - Study Status: 4 Errors 1 Warning 1 Note
  - Sponsor/Collaborators: ✓
  - Oversight: ✓
  - Study Description: ✓
  - Conditions: ✓
  - Study Design: ✓
  - Arms and Interventions: ✓
  - Outcome Measures: ✓ 2 Notes
